# Supplementary material for: Facile preparation of small and narrowly distributed platinum nanoparticles in the absence of H2from Pt(ii) and Pt(0) molecular precursors using trihydrogeno(octyl)silane
Source: Royal Society of Chemistry journal article supplement (doi:10.1039/c4nj01189a), 2014-09-26

## Supporting Information

### **Facile preparation of small and narrowly distributed platinum nanoparticles in the absence of H<sub>2</sub> from Pt(II) and Pt(0) molecular precursors using trihydrogeno(octyl)silane.**

*Pierre Laurent<sup>a,b</sup>, David Baudouin,<sup>c</sup> Sébastien Donet,<sup>b</sup> Christophe Copéret<sup>c</sup> and Chloé Thieuleux<sup>a</sup>*

*a Université de Lyon, Institut de Chimie de Lyon, UMR 5265 C2P2 - CNRS - Université Lyon 1- ESCPE Lyon, Equipe Chimie Organométallique de Surface 43, Bd du 11 Novembre 1918 F-69616 Villeurbanne, France.*

*b CEA, LITEN, Département des Technologies des Nanomatériaux, Laboratoire des Technologies de Surfaces (LTS), 17, Rue des Martyrs, 38054 Grenoble, France*

*c ETH Zürich, Department of Chemistry, Laboratory of Inorganic Chemistry, Wolfgang Pauli Strasse 10, CH-8093, Zürich, Switzerland.*

### **Liquid State NMR – Kinetic experiments**

A solution (**A**) of  $\text{CODPt}(\text{OSi}(\text{O}i\text{Bu})_3)_2$  at  $24\text{mmol.L}^{-1}$  was prepared in  $\text{THF-d}^8$  along with a solution (**B**) of trihydrogeno(octyl)silane at  $24\text{mmol.L}^{-1}$  also in  $\text{THF-d}^8$ . Under Inert atmosphere 0.5 mL of **A** was placed in a Young NMR tube. The final concentration in the tube is thus  $12\text{mmol.L}^{-1}$  corresponding to 10 mg of platinum precursor assuring a proper NMR signal. This concentration is 8 times the one used for the synthesis of nanoparticle in schlenks. After freezing in liquid nitrogen, still under inert atmosphere 0.5 mL of **B** was added in the NMR tube. Before introducing the NMR tube in the spectrometer it was heating up to  $0^\circ\text{C}$  in an ice water bath and quickly dried with paper. The direct transfer from liquid nitrogen to the spectrometer would have resulted in water condensed on the tube walls and thus poorly resolved spectra.

### **Chemicals**

Silica used for nanoparticles impregnation was obtained as follow: silica (Aerosil Degussa,  $200\text{m}^2.\text{g}^{-1}$ ) was compacted with distilled water, dried at  $110^\circ\text{C}$  for 2 days and finally calcined ( $500^\circ\text{C}$  under air for 4 hours).

**Figure S1.** TEM micrographs and particle size distribution of colloid prepared from (COD)Pt(Me)<sub>2</sub> and trihydrogeno(octyl)silane (ratio Si/Pt=1)

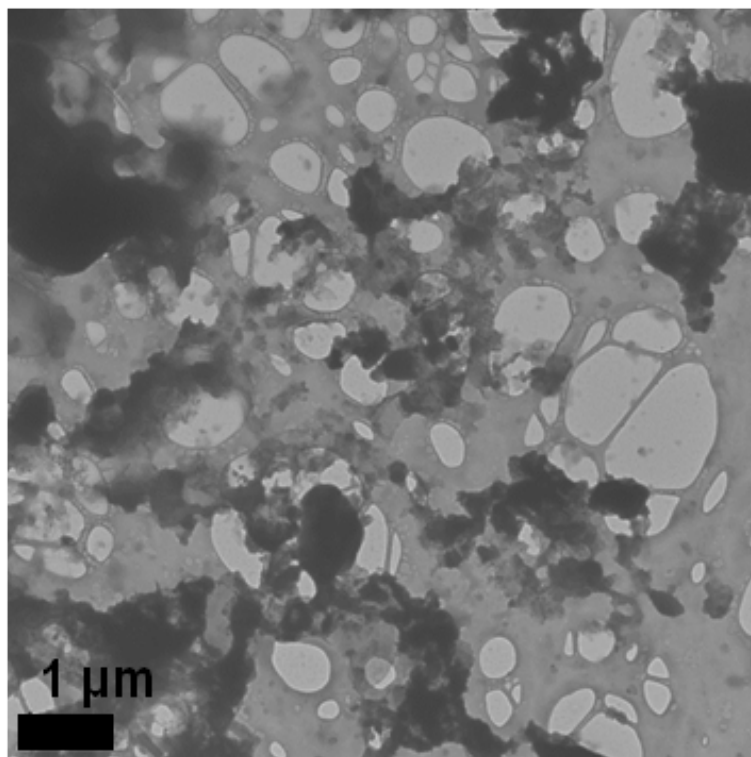

Si/Pt ratio of 1, 60°C, 48 hrs.

**Figure S2.** TEM images of Pt NP synthesized from  $\text{CODPt}(\text{OSi}(\text{O}^t\text{Bu})_3)_2$ , c) 1 equiv. octylsilane, RT, 30 min., d) 1 equiv. trihydrogeno(octyl)silane, RT, 15 hrs.

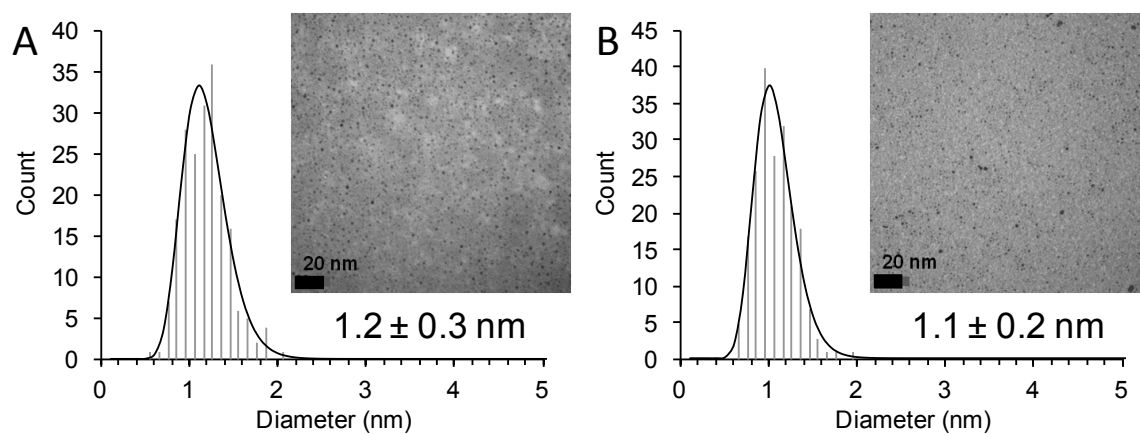

**Figure S3.** TEM micrographs and particle size distribution of colloid prepared from Pt(dba)<sub>2</sub> and trihydrogeno(octyl)silane (ratio Pt/Si=1)

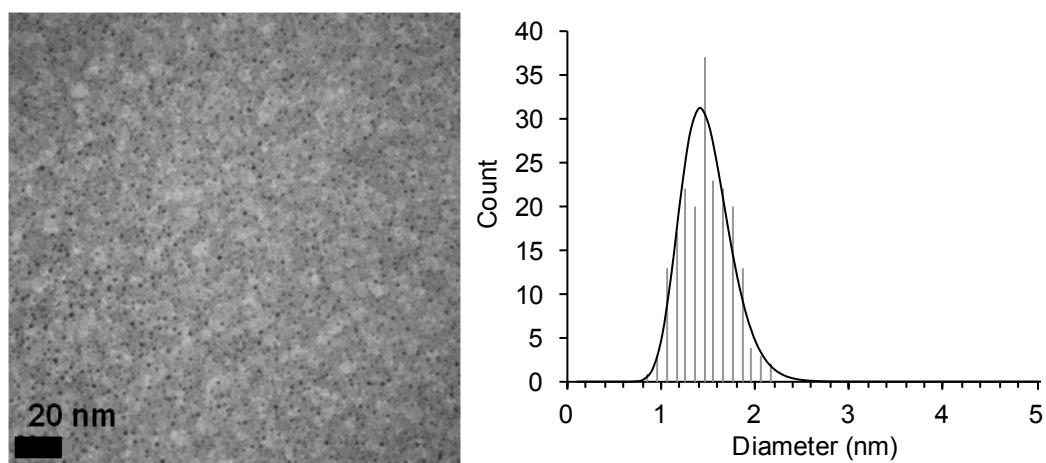

After 60 min reaction at 60°C: 1.5 nm,  $\sigma = 0.3$  nm

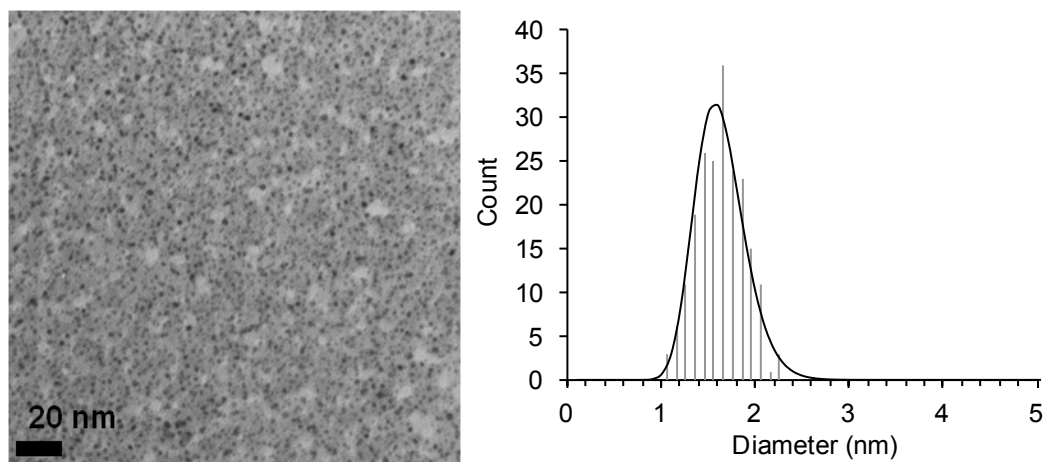

After 15 hours reaction at 60°C: 1.6 nm,  $\sigma = 0.3$  nm

**Figure S4.** In situ  $^1\text{H}$  NMR spectra of the formation of Pt nanoparticles from  $(\text{COD})\text{Pt}(\text{OSi}(\text{OtBu})_3)_2$  and trihydrogeno(octyl)silane ( $\text{Si}/\text{Pt}=1$ ) at RT in  $\text{THF-d}_8$ . The “\*” indicates THF signal.

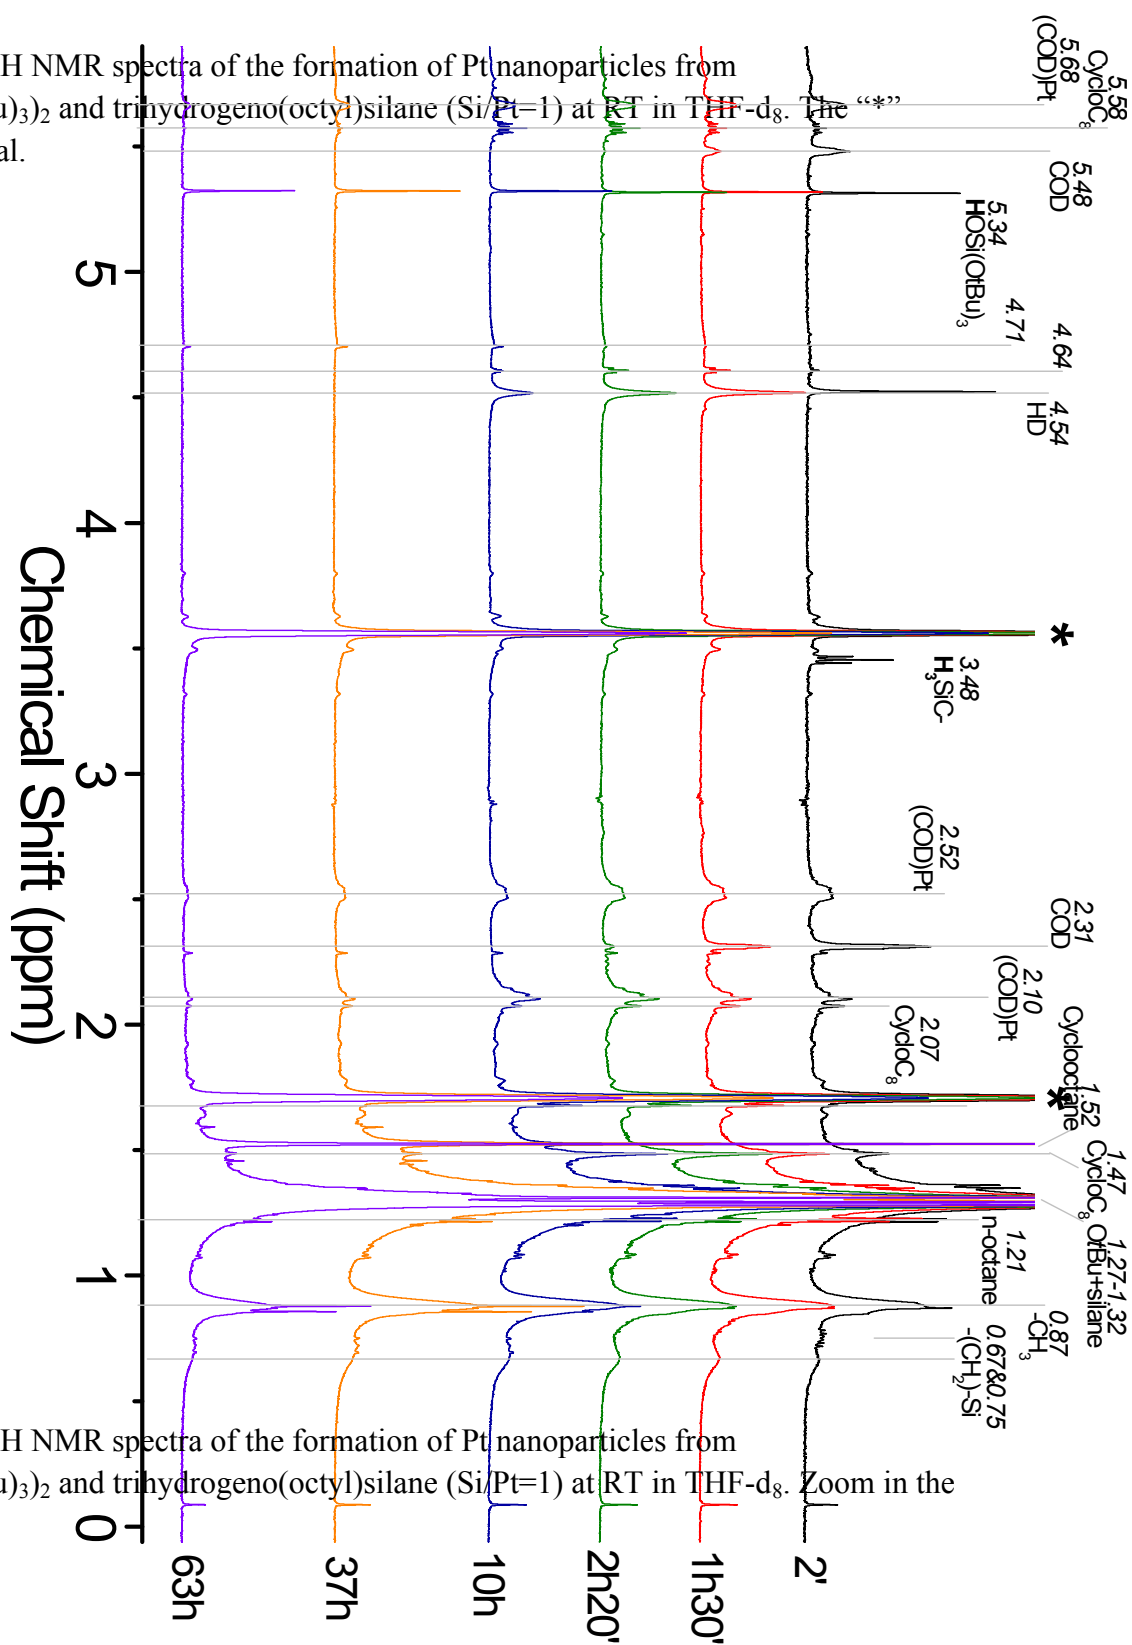

**Figure S5.** In situ  $^1\text{H}$  NMR spectra of the formation of Pt nanoparticles from  $(\text{COD})\text{Pt}(\text{OSi}(\text{OtBu})_3)_2$  and trihydrogeno(octyl)silane ( $\text{Si}/\text{Pt}=1$ ) at RT in  $\text{THF-d}_8$ . Zoom in the 1.1-1.6 ppm range.

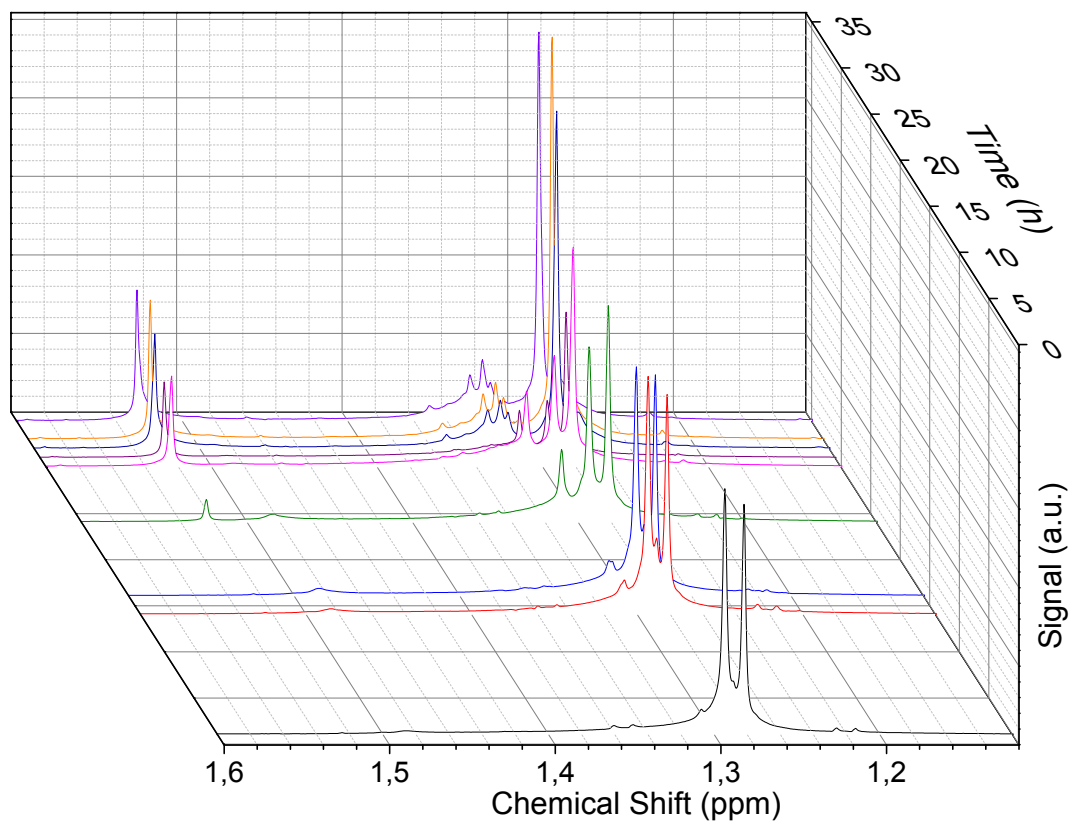

**Figure S6.** THF subtracted IR spectra of a) (COD)Pt(OSi(OtBu)<sub>3</sub>)<sub>2</sub>, b) COD, c) HOSi(OtBu)<sub>3</sub>, d) 1 equiv. C<sub>8</sub>H<sub>17</sub>SiH<sub>3</sub> at 60°C e) C<sub>8</sub>H<sub>17</sub>SiH<sub>3</sub>.

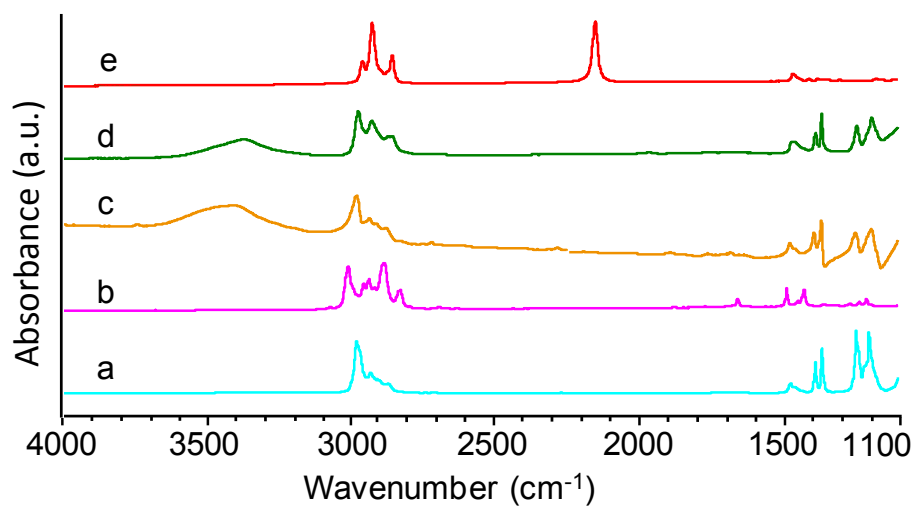



**Figure S7.** IR spectra of colloid prepared from  $(\text{COD})\text{Pt}(\text{OSi}(\text{O}t\text{Bu})_3)_2$  at  $60^\circ\text{C}$  impregnated on silica a) dried at  $120^\circ\text{C}$ , b) after calcination in air at  $320^\circ\text{C}$ , c) after reduction in  $\text{H}_2$  at  $500^\circ\text{C}$ , d) trihydrogeno(octyl)silane, e)  $\text{HOSi}(\text{O}t\text{Bu})_3$  absorbed onto silica.

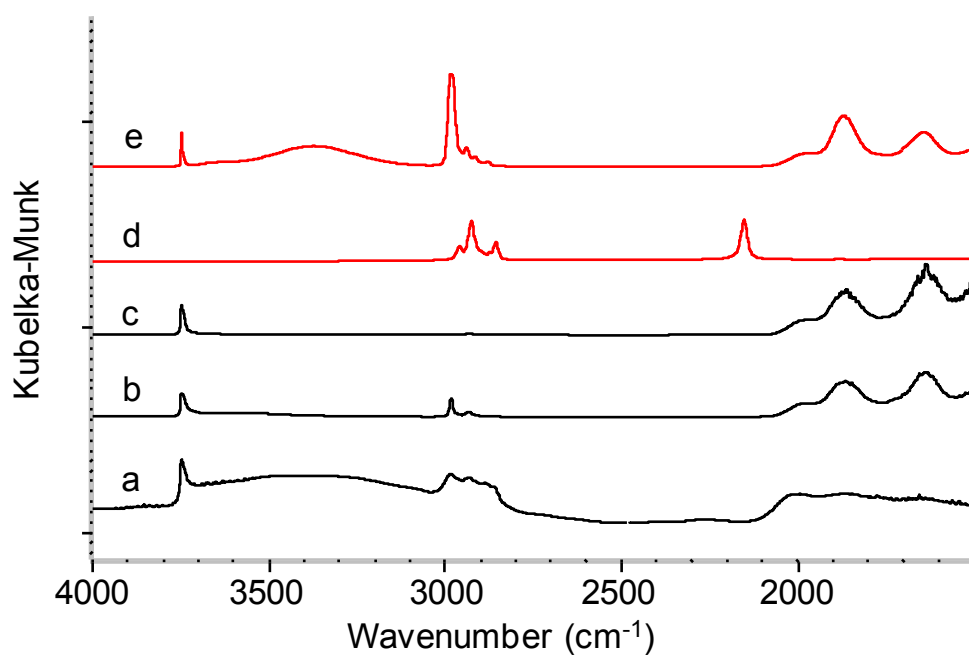

**Figure S8.** TEM images of platinum nanoparticles prepared from  $(\text{COD})\text{Pt}(\text{OSi}(\text{O}t\text{Bu})_3)_2$  at  $60^\circ\text{C}$  supported on silica. a- after impregnation of the colloid on silica; b- calcined at  $320^\circ\text{C}$  in air; c- after reduction under  $\text{H}_2$  at  $500^\circ\text{C}$ .

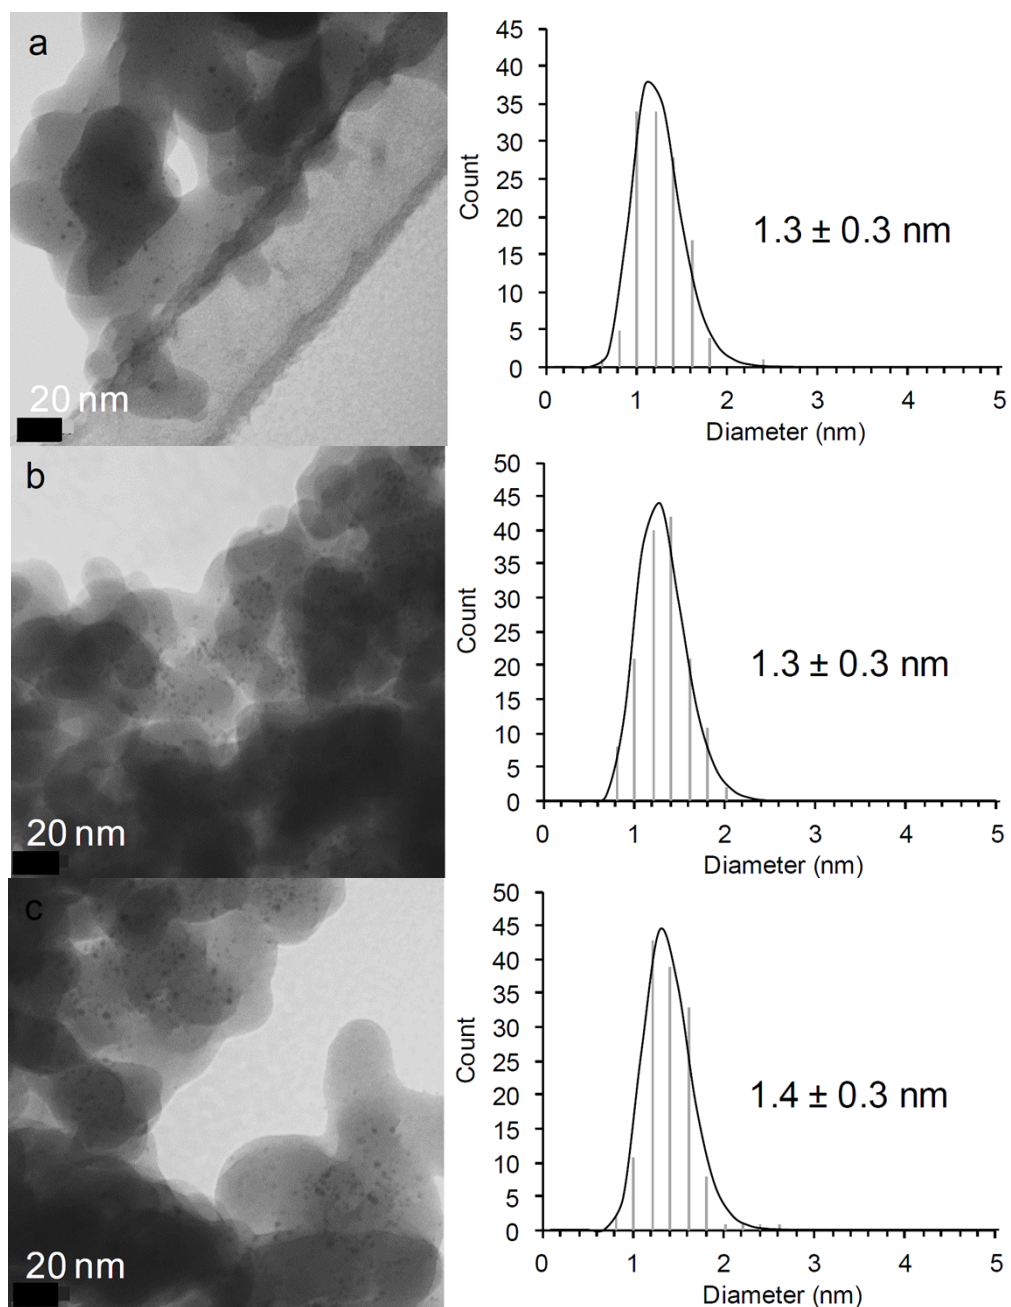

Supplement: c4nj01189a1.pdf [file c4nj01189a1.pdf]
